# Supplementary material for: Overexpression of microRNA-205-5p exerts suppressive effects on stem cell drug resistance in gallbladder cancer by down-regulating PRKCE
Source: Oxford University Press journal article supplement (doi:10.1042/bsr20194509), 2020-09-01
Supplement: bsr-2019-4509_supp.pdf [file bsr-2019-4509_supp.pdf]

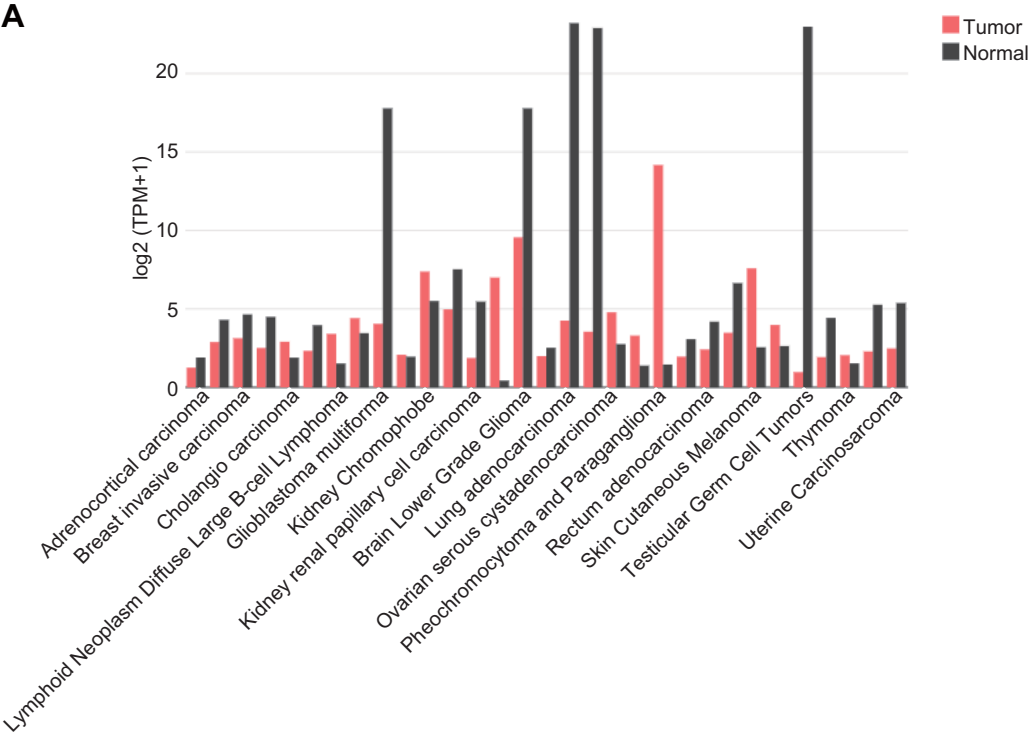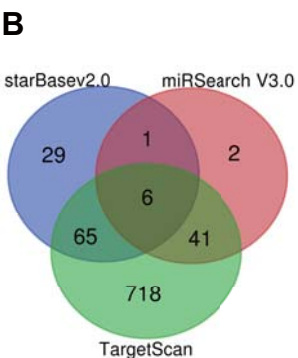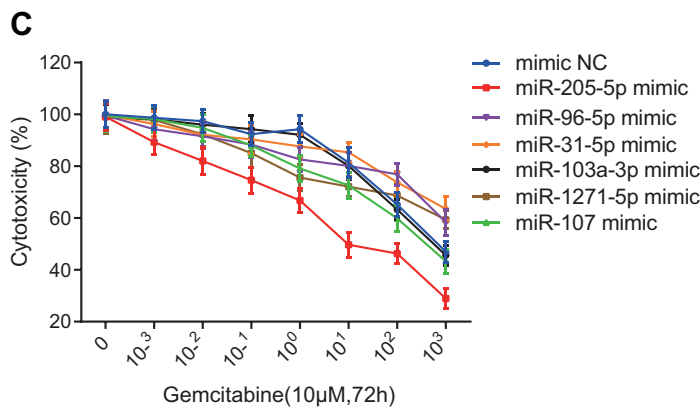

**Supplementary Figure 1** miRNA and mRNA expression profiles in GBC stem cells. A, TCGA data analysis of PRKCE expression in different cancers. Abscissa represents disease name, and ordinate represents expression value ( $\log_2$  [TPM + 1]). B, Venn map of the predicted miRNAs targeting PRKCE. C, cytotoxicity of cells after overexpression of miRNAs determined by CCK-8 assay. ACC, adrenocortical carcinoma; BRCA, breast invasive carcinoma; CHOL, cholangiocarcinoma; DLBC, lymphoid neoplasm diffuse large b-cell lymphoma; GBM, glioblastoma multiforme; HNSC, head, and neck squamous cell carcinoma; KICH, kidney chromophobe; LGG, brain lower grade glioma; LUAD, lung adenocarcinoma; OV, ovarian serous cystadenocarcinoma; PCPG, pheochromocytoma, and paraganglioma; READ, rectum adenocarcinoma; SARC, sarcoma; STAD, stomach adenocarcinoma; TGCT, testicular germ cell tumors; THYM, thymoma; UCS, uterine carcinosarcoma.
